# Supplementary material for: Changes in Gut Microbiota Correlates with Response to Treatment with Probiotics in Patients with Atopic Dermatitis. A Post Hoc Analysis of a Clinical Trial
Source: MDPI journal article supplement (doi:10.3390/microorganisms9040854), 2021-04-15
Supplement: s1 [file s1]

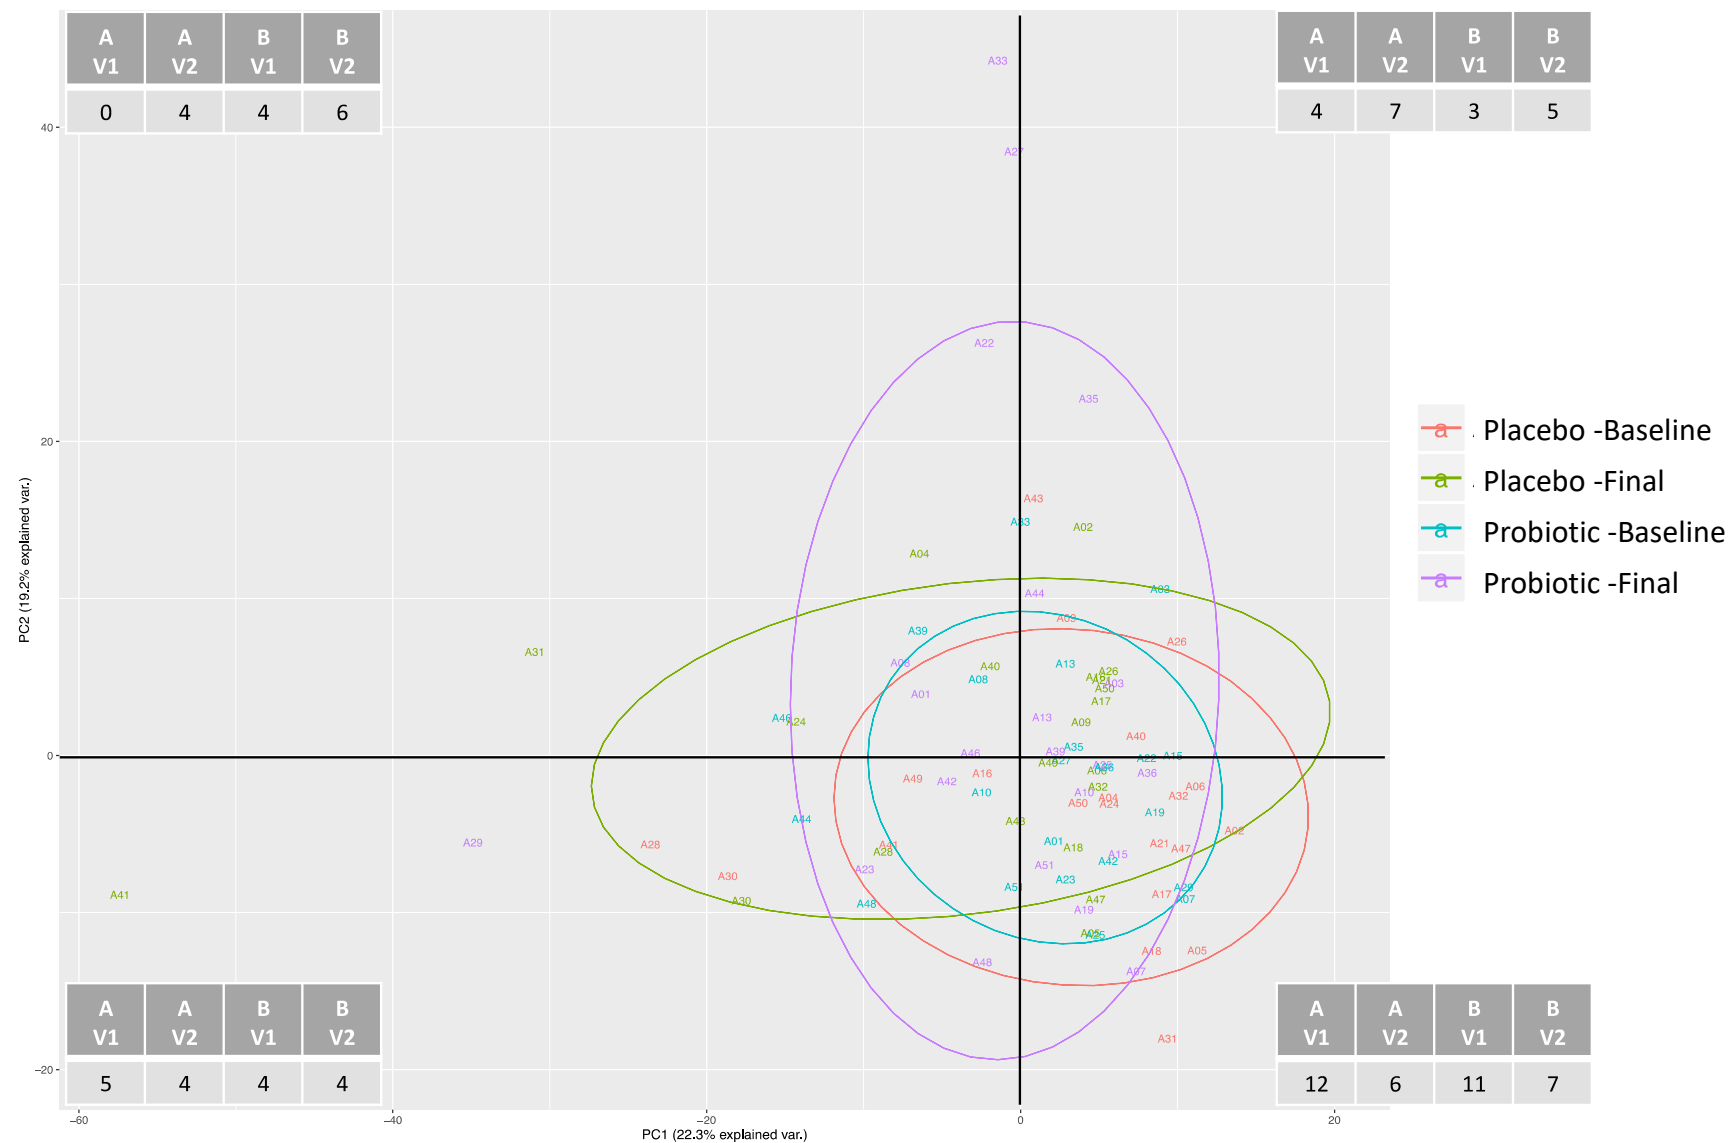

**PC1**

**Akkermansia** -0.900340965787125

**Bifidobacterium** -0.0557043486993092

**Anaerobacterium** -0.0467889211025036

**Ruminococcus** 0.14154761132399

**Faecalibacterium** 0.29253993945556

**PC2**

**Bacteroides** -0.478061763161603

**Faecalibacterium** -0.140151659544938

**Akkermansia** -0.134516595645746

**Ruminococcus** 0.127135824956158

**Collinsella** 0.17803730554487

**Bifidobacterium** 0.789722819744763

Figure S1. PCA global dermatitis study.
